# Supplementary material for: Environmental exposure assessment in European birth cohorts: results from the ENRIECO project
Source: PubMed Central journal article supplement (PMC3564791; doi:10.1186/1476-069x-12-8), 2013-01-23
Supplement: 1476-069X-12-8-S1.pdf [file 1476-069X-12-8-S1.pdf]

**Environmental exposure assessment in European birth cohorts:  
results from the ENRIECO project**

**Additional Material**

Ulrike Gehring<sup>1</sup>, Maribel Casas<sup>2,3,4</sup>, Bert Brunekreef<sup>1,5</sup>, Anna Bergström<sup>6</sup>, Jens Peter Bonde<sup>7</sup>, Jérémie Botton<sup>2,3,4</sup>, Cecile Chevrier<sup>8</sup>, Sylvaine Cordier<sup>8</sup>, Joachim Heinrich<sup>9</sup>, Cynthia Hohmann<sup>10</sup>, Thomas Keil<sup>10</sup>, Jordi Sunyer<sup>2,3,4,11</sup>, Christina G. Tischer<sup>9</sup>, Gunnar Toft<sup>12</sup>, Magnus Wickman<sup>6</sup>, Martine Vrijheid<sup>2,3,4</sup>, Mark Nieuwenhuijsen<sup>2,3,4</sup>

**Affiliations**

- <sup>1</sup> Institute for Risk Assessment Sciences, Utrecht University, Utrecht, The Netherlands
- <sup>2</sup> Centre for Research in Environmental Epidemiology (CREAL), Barcelona, Spain
- <sup>3</sup> Hospital del Mar Research Institute (IMIM), Barcelona, Spain
- <sup>4</sup> Spanish Consortium for Research on Epidemiology and Public Health (CIBERESP), Spain
- <sup>5</sup> Julius Center for Health Sciences and Primary Care, University Medical Center Utrecht, The Netherlands
- <sup>6</sup> Institute of Environmental Medicine, Karolinska Institutet, Sweden
- <sup>7</sup> Department of Occupational and Environmental Medicine, Bispebjerg University Hospital, Copenhagen NV, Denmark
- <sup>8</sup> INSERM U1085 - IRSET, University of Rennes I, France
- <sup>9</sup> Helmholtz Zentrum, München & German Research Centre for Environmental Health, Institute of Epidemiology I, Neuherberg, Germany
- <sup>10</sup> Institute of Social Medicine, Epidemiology and Health Economics, Charité University Medical Center Berlin, Germany
- <sup>11</sup> Universitat Pompeu Fabra (UPF), Spain
- <sup>12</sup> Department of Occupational Medicine, Aarhus University Hospital, Denmark

**Table S1.** Experts who participated in the different working groups.

| <b>Exposure</b>                       | <b>WG-group leader</b>                                                                                                 | <b>Participants<sup>a</sup></b>                                                                                                                                                                                                                                                                                                                              |
|---------------------------------------|------------------------------------------------------------------------------------------------------------------------|--------------------------------------------------------------------------------------------------------------------------------------------------------------------------------------------------------------------------------------------------------------------------------------------------------------------------------------------------------------|
| Outdoor air pollution                 | Ulrike Gehring<br><a href="mailto:u.gehring@uu.nl">u.gehring@uu.nl</a>                                                 | Ferran Ballester, Bert Brunekreef, Ann Colles, Vicky Patelarou, Frank Pierik, Kinga Polanska                                                                                                                                                                                                                                                                 |
| Water contamination                   | Mark Nieuwenhuijsen<br><a href="mailto:mnieuwenhuijsen@creal.cat">mnieuwenhuijsen@creal.cat</a>                        | J r mie Botton, Maribel Casas, Sylvaine Cordier, Vicky Patelarou,                                                                                                                                                                                                                                                                                            |
| Allergens & microbial agents          | Joachim Heinrich<br><a href="mailto:joachim.heinrich@helmholtz-muenchen.de">joachim.heinrich@helmholtz-muenchen.de</a> | Chih-Mei Chen, Ulrike Gehring, Christina Tischer, Constantine Vardavas                                                                                                                                                                                                                                                                                       |
| Metals                                | Jordi Sunyer<br><a href="mailto:jsunyer@creal.cat">jsunyer@creal.cat</a>                                               | Ferran Ballester, Maribel Casas, Kinga Polanska, Constantine Vardavas, Michael Wilhelm                                                                                                                                                                                                                                                                       |
| Pesticides                            | Cecile Chevrier<br><a href="mailto:cecile.chevrier@rennes.inserm.fr">cecile.chevrier@rennes.inserm.fr</a>              | Sylvaine Cordier, Claire Petit, Frank Pierik, Stephanie Vandentorren                                                                                                                                                                                                                                                                                         |
| Persistent organic pollutants         | Gunnar Toft<br><a href="mailto:gunttoft@rm.dk">gunttoft@rm.dk</a>                                                      | Jens Peter Bonde, Merete Eggersb , Hannu Kiviranta, Vicky Patelarou, Greet Schoeters, Remy Slama, Stephanie Vandentorren, Michael Wilhelm                                                                                                                                                                                                                    |
| Other chemical exposures              | Martine Vrijheid<br><a href="mailto:mvrijheid@creal.cat">mvrijheid@creal.cat</a>                                       | Maribel Casas, Elly Den Hond, Ilias Kavouras, Frank Pierik, St phanie Vandentorren, Gunnar Vase Toft, Michael Wilhelm                                                                                                                                                                                                                                        |
| Radiations                            | Martine Vrijheid<br><a href="mailto:mvrijheid@creal.cat">mvrijheid@creal.cat</a>                                       | Elisabeth Cardis, Maribel Casas, Payam Dadvand, Mark Nieuwenhuijsen<br><br>External experts: Anke Huss, Roel Vermeulen                                                                                                                                                                                                                                       |
| Smoking and second hand tobacco smoke | Magnus Wickman<br><a href="mailto:magnus.wickman@ki.se">magnus.wickman@ki.se</a>                                       | Anna Bergstr m, Ulrike Gehring, Eva Hallner, Cynthia Hohmann, Thomas Keil,  sa Neuman, Mattias  berg, G ran Pershagen                                                                                                                                                                                                                                        |
| Noise                                 | Thomas Keil<br><a href="mailto:thomas.keil@charite.de">thomas.keil@charite.de</a>                                      | Maria Pia Fantini, Cynthia Hohmann, Yvonne de Kluizenaar, Lorenza Luciano, Frank Pierik                                                                                                                                                                                                                                                                      |
| Occupational exposures                | Sylvaine Cordier<br><a href="mailto:sylvaine.cordier@univ-rennes1.fr">sylvaine.cordier@univ-rennes1.fr</a>             | Jens Peter Bonde, Lex Burdorf, Merete Eggesb , Ana Maria Garcia, Regina Gra ulevi ien , Manolis Kogevinas, Mark Nieuwenhuijsen, Anne-Marie Nybo-Andersen, Vicky Patelarou, Frank Pierik, Ana Cristina Santos, Claudia Snijder, Martine Vrijheid, Tanja Vrijkotte<br><br>External experts : Jo lle F votte, Hans Kromhout, Nel Roeleveld, Martie Van Tongeren |

<sup>a</sup> in alphabetic order

**Table S2.** Modelling of outdoor air pollution in European birth cohorts.

| Cohort       | NO <sub>2</sub> | NO <sub>x</sub> /NO | PM <sub>2.5</sub> | PM <sub>coarse</sub> | PM <sub>10</sub> | “Soot” | SSE | Others              | N <sup>a,b</sup> | Timing <sup>b</sup>   |
|--------------|-----------------|---------------------|-------------------|----------------------|------------------|--------|-----|---------------------|------------------|-----------------------|
| ABCD         | ●◇              | ◇                   | ◇                 | ◇                    | ◇                | ◇      | ◇   |                     | ~ 7,600          | Pregnancy & birth     |
| BAMSE        | ●◇              | ◇▲                  | ●◇                | ◇                    | ◇▲               | ●◇     | ◇   | ▲ SO <sub>2</sub>   | ~3,700           | 1yr, 4-8 yrs          |
| BiB          | ◇               | ◇                   |                   |                      |                  |        |     |                     |                  |                       |
| DNBC         | ◇▲              | ◇▲                  | ◇                 | ◇                    | ◇                | ◇      | ◇   | ▲ Ozone             | ~18,000          | 0-1.5 yrs             |
| EDEN         | ●◇▲             | ◇                   |                   |                      | ▲                |        |     | Δ Benzene           | 700-1,000        | Pregnancy             |
| ELFE         | △               | △                   | △                 |                      | △                |        |     | △ Ozone             |                  |                       |
| GAPS II      | ●▲              | ●▲                  | ▲                 |                      | ▲                | ▲      |     | ▲ Ozone             | 581-708          | Birth-4 yrs           |
| Generation R | ◇▲              | ◇                   | ◇                 | ◇                    | ◇▲               | ◇△     | ◇   |                     | ~9,000           | All ages              |
| GINIplus     | ●◇              | ◇                   | ●◇△               | ◇                    | ◇                | ●◇     | ◇   |                     | 3,878-5,991      | Birth, 1, 2, 4, 6 yrs |
| INMA old     |                 |                     |                   |                      |                  |        |     |                     |                  |                       |
| Granada      | ●◇              | ●◇                  |                   |                      |                  |        |     |                     | 220              | 4 yrs                 |
| Menorca      | ○               | ○                   |                   |                      |                  |        |     |                     |                  |                       |
| INMA new     |                 |                     |                   |                      |                  |        |     |                     |                  |                       |
| Asturias     | ●◇              | ◇                   | ○                 |                      | ○                |        |     | ● Benzene;<br>○ TEX | 478              | Pregnancy             |
| Gipuzkoa     | ●◇              | ◇                   |                   |                      |                  |        |     | ● Benzene           | 597              | Pregnancy             |
| Sabadell     | ●◇              | ●◇                  |                   |                      |                  |        |     | ● BTEX              | 608              | Pregnancy & any age   |
| Valencia     | ●◇              | ◇                   | ◇                 | ◇                    | ◇                | ◇      | ◇   | ○ BTEX              | 785              | Pregnancy             |
| KANC         | ◇               | ◇▲                  | ◇▲                | ◇                    | ◇▲               | ◇      | ◇   |                     | 4,000            | Pregnancy & birth     |
| Leicester    | ○               | ○                   |                   |                      | ○▲               |        |     |                     | ~1,000           | 1 and 4 yrs           |
| LISAplus     | ●◇              | ◇                   | ●◇                | ◇                    | ◇                | ●◇     | ◇   |                     | 1,314-2,357      | 0, 2, 6 yrs           |
| MOBA         | ◇               | ◇                   | ◇                 | ◇                    | ◇                | ◇      | ◇   |                     |                  |                       |
| NINFEA       | ◇               | ◇                   | ◇                 | ◇                    | ◇                | ◇      | ◇   |                     |                  |                       |
| PARIS        | ◇               | ▲                   | ◇                 |                      | ◇                |        |     |                     |                  | All ages              |
| PIAMA        | ●◇              | ◇                   | ●◇                | ◇                    | ◇                | ●◇     | ◇   |                     | 3,953            | Pregnancy & birth     |
| RHEA         | ◇               | ◇                   | ◇                 | ◇                    | ◇                | ◇      | ◇   |                     |                  | Pregnancy & birth     |

<sup>a</sup> number of children with exposure information

<sup>b</sup> only for work that has been done already

● Land-use regression (LUR) done (outside ESCAPE); ○ LUR planned (outside ESCAPE); ◇ LUR ongoing work within ESCAPE; ▲ Dispersion modelling done; Δ Dispersion modelling planned

PM<sub>coarse</sub> = PM<sub>10</sub>-PM<sub>2.5</sub>; Soot = reflectance of PM<sub>2.5</sub> filters or elemental carbon; (B)TEX = (benzene, ) toluene, ethylbenzene, xylenes; SO<sub>2</sub> = Sulfur dioxide;

SSE = “source specific” elements from X-ray fluorescence

mo = months, yrs = yrs

**Table S3.** Assessment of exposure to allergens and microbial agents by means of environmental monitoring in European birth cohorts.

|           | Component measured (time point <sup>a</sup> ) |                                             |                                                      |                                                                            |                                          | N (time point) <sup>b</sup>                                                                                                    |
|-----------|-----------------------------------------------|---------------------------------------------|------------------------------------------------------|----------------------------------------------------------------------------|------------------------------------------|--------------------------------------------------------------------------------------------------------------------------------|
|           | Cat                                           | Dog                                         | House dust mite                                      | Mould                                                                      | Bacteria                                 |                                                                                                                                |
| BAMSE     | Fel d1 (2 mo, 7 yrs)                          | Can f1 (2 mo)                               | Der p1 & Der f1 (2 mo, 7 yrs)                        | $\beta$ (1,3) glucan, EPS<br><i>Asp/Pen</i> (7 yrs)                        | Endotoxin (7 yrs)                        | 533 (2 mo), 358 (7 yrs)                                                                                                        |
| ELFE      |                                               |                                             |                                                      | Alternaria, Aspergillus, Cladosporium, Penicillium, Stachybotrys chartarum |                                          | 0-1 yr *                                                                                                                       |
| GINIplus  | Fel d1                                        |                                             | Der p1 & Der f1                                      | $\beta$ (1,3) glucan, EPS<br><i>Asp/Pen</i>                                | Endotoxin                                | 219 (5-6 yrs)                                                                                                                  |
| INMA old  |                                               |                                             |                                                      |                                                                            |                                          |                                                                                                                                |
| Menorca   | Fel d1                                        |                                             | Der p1                                               |                                                                            |                                          | 482 (3 mo), 11 yrs*                                                                                                            |
| INMA new  |                                               |                                             |                                                      |                                                                            |                                          |                                                                                                                                |
| Asturias  | Fel d1                                        |                                             | Der p1                                               |                                                                            | Pollen                                   | 4 yrs*                                                                                                                         |
| Sabadell  | Fel d1                                        |                                             | Der p1                                               |                                                                            | Pollen                                   | 14 and 30 mo.*                                                                                                                 |
| Kraków    | Fel d1                                        | Can f1                                      | Der p1 & Der f1                                      |                                                                            |                                          | 336 (3 yr), 250 (5 yr)                                                                                                         |
| LISApplus | Fel d1 (3 mo, 5-6 & 10 yrs)                   |                                             | Der p1 & Der f1 (3 mo, 5-6 yrs)                      | $\beta$ (1,3) glucan, EPS<br><i>Asp/Pen</i> (5-6 & 10 yrs)                 | Endotoxin (3 mo, 5-6 & 10 yrs)           | 2,166 (3 mo), 138 (5-6 yrs), 100 (10 yrs)                                                                                      |
| LUKAS     | Fel d1                                        |                                             | Der p1 & Der f1                                      | EPS <i>Asp/Pen</i>                                                         | Endotoxin                                | ~350 (2 mo, 1yr, 3 yrs, 6 yrs)                                                                                                 |
| MAS       | Fel d1                                        | Can f1                                      | Der p1                                               |                                                                            |                                          | 1,000 (3mo), 800 (18 mo), 600 (3 yrs)                                                                                          |
| PARIS     |                                               |                                             | Der p1 & Der f1                                      | Alternaria, Aspergillus, Cladosporium, Penicillium                         | Endotoxin                                | Pollen<br>162-196 (1 mo), 157-196 (6 or 9 mo)                                                                                  |
| PIAMA     | Fel d1 (pregnancy, 3 mo, 1, 4, 5-6 & 8 yrs)   | Can f1 (pregnancy, 3 mo, 1, 4, 5-6 & 8 yrs) | Der p1 & Der f1 (pregnancy, 3 mo, 1, 4, 5-6 & 8 yrs) | $\beta$ (1,3) glucan, EPS<br><i>Asp/Pen</i> (pregnancy, 3 mo, 1 & 5-6 yrs) | Endotoxin (pregnancy, 3 mo, 1 & 5-6 yrs) | Allergens/mould,bacteria:<br>700/200 (pregnancy), 1,750/700 (3 mo.), 200/100 (1 yr), 1,000 (4 yrs), 350 (5-6 yrs), 100 (8 yrs) |

\* planned/ongoing

<sup>a</sup> if components were measured at different time points

<sup>b</sup> N = number of children with exposure information; only for work that has been done already; excluding ongoing/planned work

Can f = Canis familiaris; Der p = Dermatophagoides pteronyssinus; Der f = Dermatophagoides farinae; Fel d = Felis domesticus;

EPS *Asp/Pen* = Extracellular polysaccharides from *Aspergillus* and *Penicillium spp.*

mo = months, yrs = yrs

**Table S4.** Biological and environmental monitoring for assessment of exposure to smoking and second hand tobacco smoke in European birth cohorts.

| Cohort                          | Component  | Medium | Timing <sup>a</sup> (N <sup>a,b</sup> )                       |
|---------------------------------|------------|--------|---------------------------------------------------------------|
| <b>Biological monitoring</b>    |            |        |                                                               |
| ALSPAC                          | Cotinine   | B      | 7 yrs (7,000, child), 15 yrs (3,500, child)                   |
| BAMSE                           | Cotinine   | U      | 4 yrs (990, child)                                            |
| Czech                           | Cotinine   | B      | Birth (293, mother)                                           |
|                                 |            | U      | 3-5 yrs (523, child), 6 yrs (980, child), 10 yrs (940, child) |
| Duisburg                        | Cotinine * | U      |                                                               |
|                                 | Nicotine * | U      |                                                               |
| EDEN                            | Cotinine * | U      |                                                               |
| ELFE                            | Cotinine * | U      |                                                               |
| GINIplus                        | Cotinine   | U      | 5-6 yrs (199, child)                                          |
| <b>INMA old</b>                 |            |        |                                                               |
| Granada                         | Cotinine   | U      | 4-5 yrs (174, child)                                          |
| Ribera Ebre                     | Cotinine * | U      |                                                               |
| <b>INMA new</b>                 |            |        |                                                               |
| Asturias                        | Cotinine * | U      |                                                               |
| Gipuzkoa                        | Cotinine * | U      |                                                               |
| Sabadell                        | Cotinine * | U      |                                                               |
| Valencia                        | Cotinine * | U      |                                                               |
| INUENDO                         | Cotinine * | B      |                                                               |
| Kraków                          | Cotinine   | B      | Pregnancy (467, mother)                                       |
|                                 |            | C      | Birth (484)                                                   |
|                                 |            | U      | 3 yrs (219, child)                                            |
| LISAplus                        | Cotinine   | U      | 5-6 yrs (119, child)                                          |
| REPRO_PL                        | Cotinine   | S      | Pregnancy (1,800, mother)                                     |
| RHEA                            | Cotinine   | H      | Pregnancy (500-600, mother)                                   |
|                                 |            | U      | 6-24 mo.(300, child)                                          |
|                                 |            | U      | Pregnancy (150, mother)                                       |
| <b>Environmental monitoring</b> |            |        |                                                               |
| BAMSE                           | Nicotine   | A      | 5-9 yrs (356)                                                 |
| GINIplus                        | Nicotine   | A      | 5-6 yrs (215)                                                 |
| LISA                            | Nicotine   | A      | 5-6 yrs (137)                                                 |
| PARIS                           | Nicotine   | A      | 1-6 mo (196), 9-12 mo (196)                                   |
| PIAMA                           | Nicotine   | A      | 1-2 yrs (90), 5-6 yrs (341)                                   |

\* planned;

<sup>a</sup> only for work that has been done already

<sup>b</sup> number of children with exposure information, mother/child indicates that sample was taken from the mother /the child

A=air; B = blood/serum; C = cord blood; H = hair; S = saliva, U = urine

NNAL = 4-methylnitrosoamino)-1-(3-pyridyl)-1-butanol

mo = months, yrs = years

**Table S5.** Assessment of exposure to water contaminants in European birth cohorts.

| <b>Cohort</b> | <b>DBPs</b> | <b>Metals</b> | <b>Nitrates</b> | <b>Pesticides</b> | <b>Endocrine disruptors</b> | <b>Others</b>                    | <b>Timing<sup>a</sup></b>     |
|---------------|-------------|---------------|-----------------|-------------------|-----------------------------|----------------------------------|-------------------------------|
| BiB           | B,E,Q       |               |                 |                   |                             |                                  | Pregnancy                     |
| Duisburg      | Q*          |               |                 |                   |                             |                                  | 8 yrs                         |
| EDEN          | E*,Q*       |               |                 |                   |                             |                                  |                               |
| ELFE          | E*,Q*       |               |                 |                   |                             |                                  |                               |
| HUMIS         |             |               |                 |                   |                             | E (not determined)               |                               |
| INMA old      |             |               |                 |                   |                             |                                  |                               |
| Granada       | B,E,Q       | E             |                 |                   | E                           |                                  | Pregnancy, 4-5 yrs            |
| Ribera Ebre   |             |               |                 | E                 |                             |                                  |                               |
| INMA new      |             |               |                 |                   |                             |                                  |                               |
| Asturias      | E,Q         |               |                 |                   |                             | E(Chlorine, physical parameters) | Pregnancy, birth, 1 yr, 4yrs  |
| Gipuzkoa      | E,Q         | E,Q           | E               |                   |                             |                                  | Pregnancy, birth, 1 yr, 4 yrs |
| Sabadell      | E,Q         | E             | E               |                   |                             |                                  | Pregnancy, 1 yr, 4 yrs        |
| Valencia      | E,Q         |               |                 |                   |                             |                                  | Pregnancy, 1 yr., 4 yrs       |
| KANC          | E,Q         | E,Q           |                 |                   |                             |                                  | Pregnancy                     |
| KOALA         | Q           |               |                 |                   |                             |                                  | 3 mo., 1 yr, 2 yrs, 5 yrs     |
| MoBa          | Q           |               |                 |                   |                             |                                  | Pregnancy                     |
| PARIS         |             |               |                 |                   |                             | Q* (Swimming pool water)         |                               |
| PÉLAGIE       | B,E,Q       |               | E               | B,E               |                             |                                  | Pregnancy                     |
| RHEA          | E,Q         |               |                 |                   |                             |                                  | Pregnancy                     |

<sup>a</sup> only for work that has been done already

\* planned

DBP = Disinfection-by-products

B = biomonitoring ; E = environmental monitoring (routine monitoring companies or newly collected water concentration); Q = questionnaire

**Table S6.** Percentage <sup>a,b</sup> of cohort participants with biomonitoring data for water contaminants, metals, persistent organic pollutants (POPs), and other chemicals.

| Cohort         | No. of children at birth | Exposure          |         |         |                              |
|----------------|--------------------------|-------------------|---------|---------|------------------------------|
|                |                          | Water contaminin. | Metals  | POPs    | Other chemicals <sup>d</sup> |
| ABCD           | 7,863                    |                   |         |         |                              |
| ALSPAC         | 14,062                   |                   | 20-33%  |         | 3%                           |
| ArcRisk-Norway | 430                      |                   | 66%     | 12-100% |                              |
| BIB            | 13,000                   | <1%               |         |         | ≤1%                          |
| DNBC           | 96,986                   |                   |         | ≤2%     |                              |
| Duisburg       | 234                      |                   | 50-94%  | 35-96%  | 36-48%                       |
| EDEN           | 1,899                    |                   | 16-48%  |         | 10%                          |
| Faroese        |                          |                   |         |         |                              |
| Cohort I       | 1,022                    |                   | 83-100% | 44-100% |                              |
| Cohort II      | 182                      |                   | 90-100% | 91-96%  |                              |
| Cohort III     | 656                      |                   | 80-100% | 76-100% | 88%                          |
| FLEHS          | 1,196                    |                   | 100%    | 100%    |                              |
| Generation R   | 9,778                    |                   |         |         | 1%                           |
| HUMIS          | 2,500                    |                   |         | 1-19%   | 15-16%                       |
| INMA old       |                          |                   |         |         |                              |
| Granada        | 668                      | 33%               | 15-17%  | 46-48%  | 4-7%                         |
| Menorca        | 482                      |                   | 62%     | 19-99%  | 19-51%                       |
| Ribera Ebre    | 102                      |                   | 70%     | 56-71%  |                              |
| INMA new       |                          |                   |         |         |                              |
| Asturias       | 485                      |                   | 71-99%  | 5%      | 6-11%                        |
| Gipuzkoa       | 611                      |                   | 83-100% | 18-100% | 5-18%                        |
| Sabadell       | 622                      |                   | 78-82%  | 4-100%  | 5-79%                        |
| Valencia       | 787                      |                   | 3-70%   | 22-69%  | 4-22%                        |
| INUENDO        | 1,322                    |                   | 30%     | 38-76%  | 27-38%                       |
| Kraków         | 505                      |                   | 48-91%  | 90-97%  |                              |
| LUKAS          | 442                      |                   | 29%     | 17-29%  | 29%                          |
| MoBa           | 107,000                  |                   |         |         | <1%                          |
| PCB cohort     | 1,134                    |                   | 9%      | 22-98%  | 18%                          |
| PELAGIE        | 3,421                    | 18%               | 15%     | 17%     | 3-17%                        |
| REPRO_PL       | 1,800                    |                   | 17-78%  | 11%     |                              |
| RHEA           | 1,500                    |                   | 3%      |         |                              |

<sup>a</sup> based on number of children at birth; <sup>b</sup> not including work that is planned; <sup>c</sup> brominated flame retardants, perfluorinated compounds, phthalates and phenols
